# Supplementary material for: A conserved SUMO pathway repairs topoisomerase DNA-protein cross-links by engaging ubiquitin-mediated proteasomal degradation
Source: PubMed Central journal article supplement — Sci Adv. 2020 Nov 13;6(46):eaba6290. doi: 10.1126/sciadv.aba6290 (PMC7673754; doi:10.1126/sciadv.aba6290), 2020-11-13
Supplement: supp_6_46_eaba6290__1.pdf [file supp_6_46_eaba6290__1.pdf]

## Supplementary Materials for

### **A conserved SUMO pathway repairs topoisomerase DNA-protein cross-links by engaging ubiquitin-mediated proteasomal degradation**

Yilun Sun\*, Lisa M. Miller Jenkins, Yijun P. Su, Karin C. Nitiss, John L. Nitiss\*, Yves Pommier\*

\*Corresponding author. Email: [yilun.sun@nih.gov](mailto:yilun.sun@nih.gov) (Y.S.); [jlNitiss@uic.edu](mailto:jlNitiss@uic.edu) (J.L.N.); [pommier@nih.gov](mailto:pommier@nih.gov) (Y.P.)

Published 13 November 2020, *Sci. Adv.* **6**, eaba6290 (2020)

DOI: [10.1126/sciadv.aba6290](https://doi.org/10.1126/sciadv.aba6290)

#### **This PDF file includes:**

Figs. S1 to S8  
Tables S1 to S8

## SUPPLEMENTARY FIGURE LEGENDS

### **Fig. S1: Inhibiting SUMOylation Prevents the Repair of Human TOP-DPCs.**

**(A)** MG132, TAK-243 or ML-792 alone does not induce TOP-DPCs. HEK293 cells were treated with CPT (1  $\mu$ M), ETP (10  $\mu$ M), MG132 (10  $\mu$ M), TAK-243 (10  $\mu$ M) or SAE inhibitor ML-792 (10  $\mu$ M) for 1 h. Cells were subjected to ICE assay for detection of TOP-DPCs using anti-TOP1, anti-TOP2 $\alpha$  and anti-TOP2 $\beta$  antibodies. Samples were probed with anti-dsDNA antibody in parallel.

**(B)** Viability curves for 72 h CPT treatments in HCT116 cells (mean  $\pm$  SD, n = 3). 25 nM ML-792 and 25 nM TAK243 were administered 4 h before the CPT treatments.

**(C)** Viability curves for 72 h ETP treatments in HCT116 cells (mean  $\pm$  SD, n = 3). 25 nM ML-792 and 25 nM TAK243 were administered 4 h before the ETP treatments.

### **Fig. S2: SUMO and Ub Modifications of Human TOP-DPCs.**

**(A)** Densitometric analyses comparing SUMO-2/3-, SUMO-1-, Ub-TOP1 signals generated from triplicate experiments including blots shown in Fig. 2D. Density of the PTM-TOP1/density of tubulin of each group was normalized to that of DMSO-treated WT His6-TOP1 cells.

**(B)** Densitometric analyses comparing SUMO-2/3-, SUMO-1-, Ub- and total TOP1-DPC signals generated from triplicate experiments including blots shown in Fig. 2G. Density of the PTM-TOP1-DPCs or total TOP1-DPCs/density of DNA of each group was normalized to that of cells treated with CPT for 10 min.

**(C)** Densitometric analyses comparing SUMO-2/3-, SUMO-1-, Ub- and total TOP2-DPC signals generated from triplicate experiments including blots shown in Fig. 2H. Density of the PTM-TOP2-DPCs or total TOP2-DPCs/density of DNA of each group was normalized to that of cells treated with ETP for 10 min.

**(D)** HEK293 cells were exposed to increasing concentrations of CPT for 30 min, followed by DUST assay for detection of SUMO-2/3-TOP1-DPCs, SUMO-1-TOP1-DPCs, Ub-TOP1-DPCs and total TOP1-DPCs.

**(E)** HEK293 cells were exposed to increasing concentrations of ETP for 30 min, followed by DUST assay for detection of SUMO-2/3-TOP1-DPCs, SUMO-1-TOP2-DPCs, Ub-TOP2-DPCs and total TOP2-DPCs.

**(F)** HEK293 cells were pretreated with MG132 (10  $\mu$ M, 1 h) or DMSO then exposed to 20  $\mu$ M CPT for 30, 120 and 360 min, followed by DUST assay for detection of SUMO-2/3-, SUMO-1-, Ub- and total TOP1-DPCs.

**(G)** HEK293 cells were pretreated with MG132 (10  $\mu$ M, 1 h) or DMSO then exposed to 20  $\mu$ M ETP for 30, 120 and 360 min, followed by DUST assay for detection of SUMO-2/3-, SUMO-1-, Ub- and total TOP2-DPCs.

**(H)** HeLa WT and TOP2B CRISPR KO cells transfected with control siRNA or TOP2A siRNA were treated with ETP (200  $\mu$ M, 30 min) before performing DUST assay for detection of SUMO-1-TOP2-DPCs, SUMO-2/3-TOP2-DPCs, Ub-TOP2-DPCs and total TOP2-DPCs.

### **Fig. S3: SUMOylation and Ubiquitylation Linkages of Human TOP-DPCs**

**(A)** HEK293 cells were transfected with indicated plasmids to overexpress HA-tagged WT and mutant ubiquitin proteins, followed by CPT treatment (20  $\mu$ M, 1 h) and DUST assay for ubiquitylated TOP1-DPC detection using HA antibody.

**(B)** HEK293 cells were transfected with indicated plasmids to overexpress HA-tagged WT and mutant ubiquitin proteins, followed by ETP treatment (200  $\mu$ M, 1 h) and DUST assay for ubiquitylated TOP2-DPC detection using HA antibody.

**(C)** HEK293 cells were transfected with indicated plasmids and siRNAs, followed by CPT treatment (20  $\mu$ M, 1 h) and DUST assay for detection of SUMO-1 and SUMO-2 modified TOP1-DPCs using HA antibody.

**(D)** HEK293 cells were transfected with indicated plasmids and siRNAs, followed by ETP treatment (200  $\mu$ M, 1 h) and DUST assay for detection of SUMO-1 and SUMO-2 modified TOP2-DPCs using HA antibody.

### **Fig. S4: PIAS4 Physically Interacts with TOP1, TOP2 $\alpha$ and TOP2 $\beta$ in the Absence or Presence of Topoisomerase Inhibitors.**

**(A)** Cells were transfected with the 6 $\times$ His tagged TOP1 expression plasmid, followed by treatments with DMSO or 20  $\mu$ M CPT in the absence or presence of 10  $\mu$ M MG132 for 30 min. Native His-pull down was performed and His-pull down and input samples (same input samples shown in Fig. 2A) were subjected to WB using indicated antibodies.

**(B)** Cells were transfected with the FLAG tagged TOP2 $\alpha$  expression plasmid, followed by treatments with DMSO or 200  $\mu$ M ETP in the absence or presence of MG132 for 30 min. Native FLAG-IP was performed and IP and input samples (same input samples shown in Fig. 2B left panel) were subjected to WB using indicated antibodies.

**(C)** Cells were transfected with the FLAG tagged TOP2 $\beta$  expression plasmid, followed by treatments with DMSO or ETP in the absence or presence of MG132 for 30 min. Native FLAG-IP was performed and IP and input samples (same input samples shown in Fig. 2B right panel) were subjected to WB using indicated antibodies.

**(D)** U2OS cells were transfected with empty vector (EV), FLAG-PIAS4 or RNF4-FLAG expression plasmids before DMSO or CPT treatment (20  $\mu$ M, 30 min), followed by proximity ligation assay (PLA) using anti-TOP1 and anti-FLAG antibodies. Scale bar represents 10  $\mu$ m.

**(E)** U2OS cells were transfected with empty vector, FLAG-PIAS4 or RNF4-FLAG expression plasmids before DMSO or ETP treatment (200  $\mu$ M, 30 min), followed by PLA using anti-TOP2 $\alpha$  and anti-FLAG antibodies. Scale bar represents 10  $\mu$ m.

**(F)** Cells were transfected with indicated siRNAs, followed by WB of the whole cellular lysates to validate downregulation of each protein.

**(G)** PIAS4 does not auto-SUMOylate. SUMO-1 and SUMO-2 conjugation assay incubated with SUMO E1, SUMO E2, SUMO proteins and increasing concentrations of PIAS4 in the absence of topoisomerases. Reaction products were separated by SDS-PAGE and monitored by WB using anti-PIAS4 antibody, anti-SUMO-1 antibody and anti-SUMO-2/3 antibody.

**(H)** RNF4 does not auto-ubiquitylate. Ub conjugation assay incubated with Ub E1, Ub E2, SUMO proteins and increasing concentrations of RNF4 in the absence of topoisomerases. Reaction products were separated by SDS-PAGE and monitored by WB using anti-RNF4 antibody and anti-Ub antibody.

**Fig. S5: Coordination of PIAS4 and RNF4 for TOP-DPC repair.**

**(A)** WB with anti-PIAS4 antibody to validate the depletion of PIAS4 in HCT116 PIAS4 CRISPR KO cells.

**(B)** Densitometric analyses comparing SUMO-2/3-, SUMO-1-, Ub- and total TOP1-DPC signals generated from triplicate experiments including blots shown in Fig. 4A. Density of the PTM-TOP1-DPCs or total TOP1-DPCs/density of DNA of each group was normalized to that of WT cells treated with CPT for 30 min. NS, not significant.

**(C)** Densitometric analyses comparing SUMO-2/3-, SUMO-1-, Ub- and total TOP2-DPC signals generated from triplicate experiments including blots shown in Fig. 4B. Density of the PTM-TOP2-DPCs or total TOP2-DPCs/density of DNA of each group was normalized to that of WT cells treated with ETP for 30 min.

**(D)** WB with anti-RNF4 antibody to validate the depletion of RNF4 in MCF7 RNF4 CRISPR KO cells.

**(E)** Densitometric analyses comparing SUMO-2/3-, SUMO-1-, Ub- and total TOP1-DPC signals generated from triplicate experiments including blots shown in Fig. 4C. Density of the PTM-TOP1-DPCs or total TOP1-DPCs/density of DNA of each group was normalized to that of WT cells treated with CPT for 30 min.

**(F)** Densitometric analyses comparing SUMO-2/3-, SUMO-1-, Ub- and total TOP2-DPC signals generated from triplicate experiments including blots shown in Fig. 4D. Density of the PTM-TOP2-DPCs or total TOP2-DPCs/density of DNA of each group was normalized to that of WT cells treated with ETP for 30 min.

**(G)** WB with anti-FLAG antibody in HCT116 cells transfected with empty vector, FLAG-PIAS4 WT, FLAG-PIAS4, FLAG-PIAS4 SAP $\Delta$  or FLAG-PIAS4 C342A expression plasmids for 48 h.

**(H)** WB with anti-FLAG antibody in MCF7 cells transfected with empty vector or RNF4-FLAG WT, RNF4-FLAG SIM $\Delta$  or RNF4-FLAG H156A expression plasmids for 48 h.

**(I)** Left: U2OS cells were transfected with indicated plasmids (FLAG-tagged) before CPT treatment (20  $\mu$ M, 30 min), followed by PLA using anti-TOP1 and anti-FLAG antibodies. Right: U2OS cells were transfected with indicated plasmids (FLAG-tagged) before ETP treatment (200  $\mu$ M, 30 min), followed by PLA using anti-TOP2 $\alpha$  and anti-FLAG antibodies. Scale bars represent 10  $\mu$ m.

**(J)** Densitometric quantitation of foci per cells of each treatment group as shown in panel I.

**Fig. S6: SUMOylation and SUMO-dependent ubiquitylation of TOP-DPCs are induced independently of replication, transcription and DDRs in Human Cells.**

**(A)** HEK293 cells were pre-treated with the DNA-PK inhibitor VX984 (10  $\mu$ M, 6 h), the ATM inhibitor KU55399 (10  $\mu$ M, 6 h), the ATR inhibitor AZD6738 (10  $\mu$ M, 6 h), the replication inhibitor aphidicolin (APH, 10  $\mu$ M, 2 h), the transcription inhibitor DRB (100  $\mu$ M, 2 h) before treatment with CPT (20  $\mu$ M, 1 h). DUST assay was performed to detect SUMO-2/3-, SUMO-1-, Ub-, and total TOP1-DPCs.

**(B)** HEK293 cells were pre-treated with the DNA-PK inhibitor VX984 (10  $\mu$ M, 6 h), the ATM inhibitor KU55399 (10  $\mu$ M, 6 h), the ATR inhibitor AZD6738 (10  $\mu$ M, 6 h), the replication inhibitor aphidicolin (APH, 10  $\mu$ M, 2 h), the transcription inhibitor DRB (100  $\mu$ M, 2 h) before treatment with ETP (200  $\mu$ M, 1 h). DUST assay was performed to detect SUMO-2/3-, SUMO-1-, Ub-, and total TOP2-DPCs.

(C) HEK293 cells were transfected with or without the RNF4 overexpression plasmid as indicated. Following pre-treatment with APH, DRB or ML-792, 20  $\mu$ M CPT was added for an additional 1 h. DUST assay was performed to detect Ub- and total TOP1-DPCs.

(D) HEK293 cells were transfected with or without the RNF4 overexpression plasmid as indicated. Following pre-treatment with APH, DRB or ML-792, 200  $\mu$ M ETP was added for an additional 1 h. DUST assay was performed to detect Ub- and total TOP2-DPCs.

**Fig. S7: RNF4 Drives Proteasomal Degradation of TOP-DPCs and Responses to Topoisomerase-Mediated DNA damage.**

(A-C) Densitometric analyses comparing TOP1-, TOP2 $\alpha$ - or TOP2 $\beta$ -DPC signals generated from triplicate experiments including blots shown in Fig. 5A-C. Density of TOP-DPCs/density of DNA of each group was normalized to MCF WT cells treated with CPT or ETP alone.

(D) HEK293 cells were transfected with empty vector, HA-Ub K48 or HA-Ub K63, followed by transfection with RNF4 as indicated. Following CPT treatment (20  $\mu$ M, 1 h), cells were subjected to DUST assay for detecting ubiquitylated TOP1-DPCs using anti-HA antibody.

(E) HEK293 cells were transfected with empty vector, HA-Ub K48 or HA-Ub K63, followed by transfection with RNF4 as indicated. Following ETP treatment (200  $\mu$ M, 1 h), cells were subjected to DUST assay for detecting ubiquitylated TOP2-DPCs using anti-HA antibody.

(F) U2OS cells were transfected with indicated siRNAs, followed by 1 h CPT (1  $\mu$ M) treatment and IF for detection of  $\gamma$ H2AX. Scale-bar represents 20  $\mu$ m.

(G) Densitometric quantitation of foci per cells for each treatment group from experiments performed as shown in panel F.

(H) U2OS cells were transfected with indicated siRNAs, followed by 1 h ETP (5  $\mu$ M) treatment and IF for detection of  $\gamma$ H2AX. Scale-bar represents 20  $\mu$ m.

(I) Densitometric quantitation of foci per cells of each treatment group from experiments performed as shown in panel H.

(J) HEK293 cells were transfected with indicated siRNAs, followed by CPT (20  $\mu$ M) treatment. Cells were collected at indicated time points for WB for detection of  $\gamma$ H2AX. Density of  $\gamma$ H2AX/density of tubulin of each group was normalized to that of control cells at time = 0.

(K) HEK293 cells were transfected with indicated siRNAs, followed by ETP (200  $\mu$ M) treatment. Cells were collected at indicated time points for WB for detection of  $\gamma$ H2AX. Density of  $\gamma$ H2AX/density of tubulin of each group was normalized to that of control cells at time = 0.

**Fig. S8: The SUMO-Ub-Proteasome Pathway Repairs Topoisomerase-Mediated DNA Damage in Yeast.**

(A) TOP1 levels in YMM10 cells carrying pYX112 HA-TOP1 plasmid after treatments with DMSO, 10  $\mu$ M MG132, 10  $\mu$ g/ml CPT or CPT + MG132 for a total of 4 h. Lysates were analyzed by WB with anti-HA antibody.

(B) TOP2 levels in YMM10 cells carrying pDED1 TOP2-3 $\times$ HA plasmid following treatments with DMSO, MG132, 100  $\mu$ g/ml ETP or ETP + MG132 for a total of 4 h. Lysates were analyzed by WB with anti-HA antibody.

(C) YMM10 cells expressing HA-TOP1 were exposed to DMSO, 10  $\mu$ M MG132, 5  $\mu$ g/ml CPT or CPT + MG132 at 30 $^{\circ}$ C for different times (2, 4, 6, 24 h). Aliquots were removed, diluted, and plated to SD-ura plates for clonogenic assay. Cell survival is expressed as the percentage of

surviving cells at the time points relative to the viable titer at the time drug was added ( $t = 0$ ). Error bars represent the standard deviation of three independent experiments. Data points without error bars have error bars that are smaller than the symbol drawn on the graph.

**(D)** YMM10 cells expressing TOP2-HA were exposed to DMSO, 10  $\mu$ M MG132, 50  $\mu$ g/ml ETP or ETP + MG132 at 30°C for different times (2, 4, 6, 24 h) for clonogenic assay.

**(E)** WB showing TOP1 levels in YMM10 strains carrying the HA-TOP1 WT or 3KR plasmid.

**(F)** WB showing TOP2 levels in YMM10 strains carrying the TOP2-HA WT or *SNM* plasmid.

**(G)** WB showing TOP1 levels in indicated BY4741 strains carrying the HA-TOP1 plasmid.

**(H)** WB showing TOP2 levels in indicated BY4741 strains carrying the TOP2-HA plasmid.

**(I)** WB showing TOP1 levels in indicated BY4741 strains carrying the HA-TOP1 plasmid.

**(J)** WB showing TOP2 levels in indicated BY4741 strains carrying the TOP2-HA plasmid.

**(K)** Densitometric analyses comparing TOP1-DPC signals generated from triplicate experiments including blots shown in Fig. 6I. Density of TOP1-DPCs/density of DNA of each group was normalized to that of WT cells.

**(L)** Densitometric analyses comparing TOP2-DPC signals generated from triplicate experiments including blots shown in Fig. 6J. Density of TOP2-DPC/density of DNA of each group was normalized to that of WT cells.

**Fig. S1: Inhibiting SUMOylation Prevents the Repair of TOP1- and TOP2-DPCs in Human Cells.**

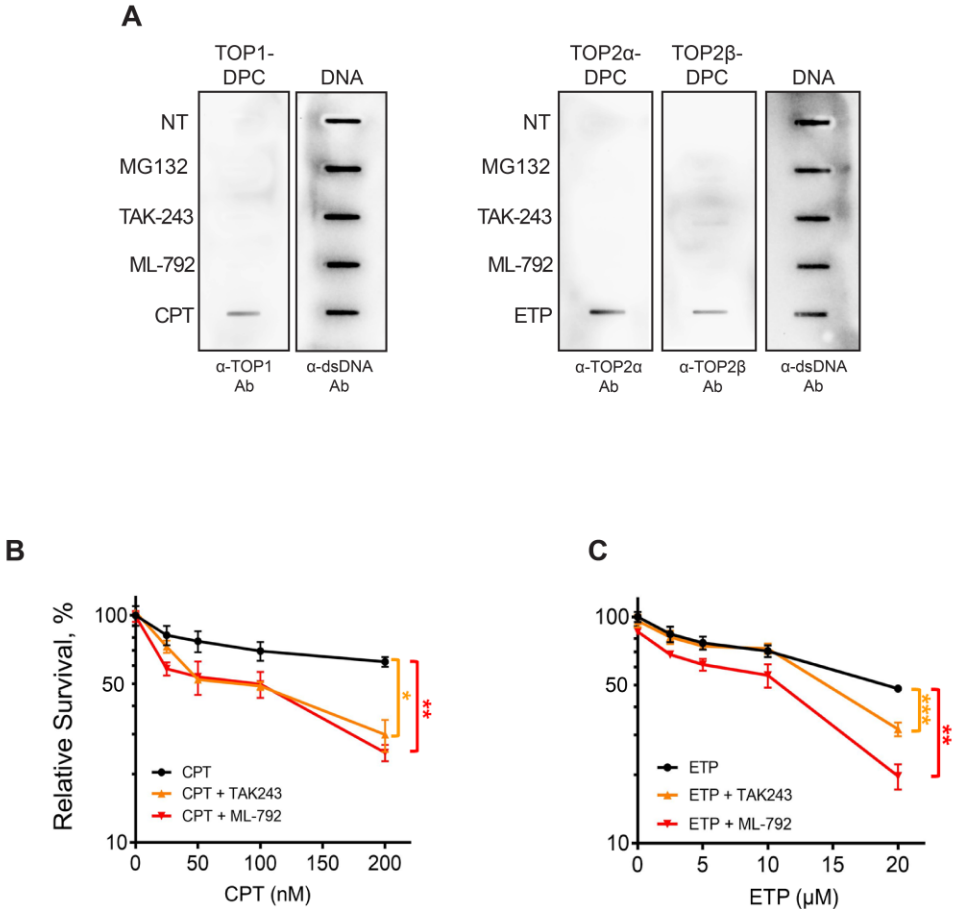

**Fig. S2: SUMO and Ub Modifications of TOP1- and TOP2-DPCs in Human Cells**

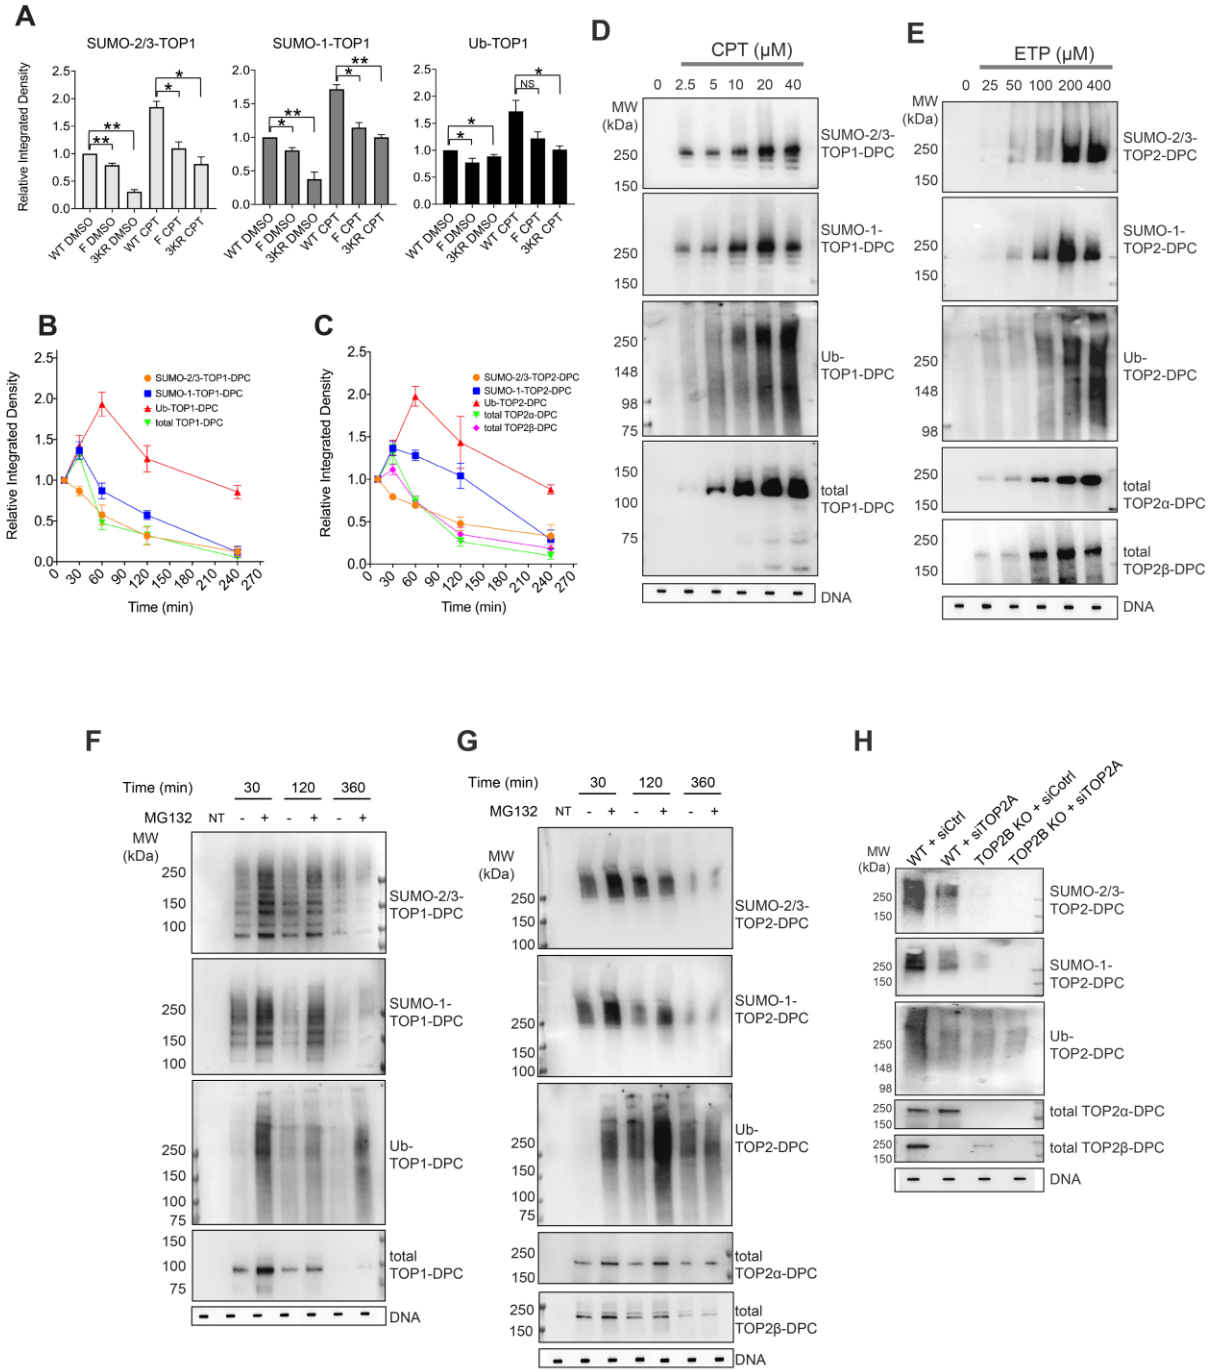



**Fig. S3: SUMOylation and Ubiquitylation Linkages of TOP1- and TOP2-DPCs in Human Cells.**

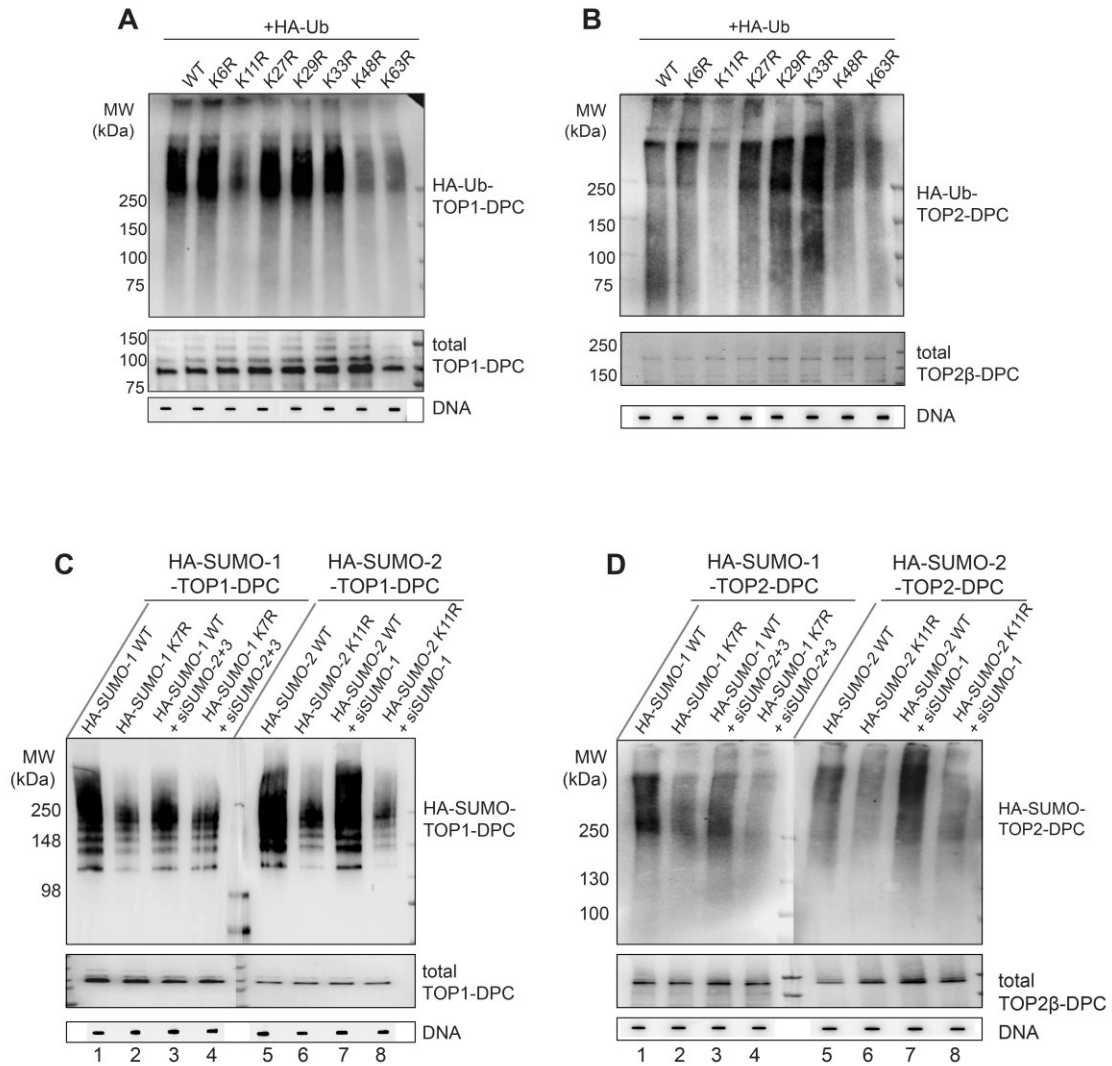

**Fig. S4: PIAS4 Physically Interacts with TOP1, TOP2 $\alpha$  and TOP2  $\beta$  in the Absence or Presence of topoisomerase Inhibitors**

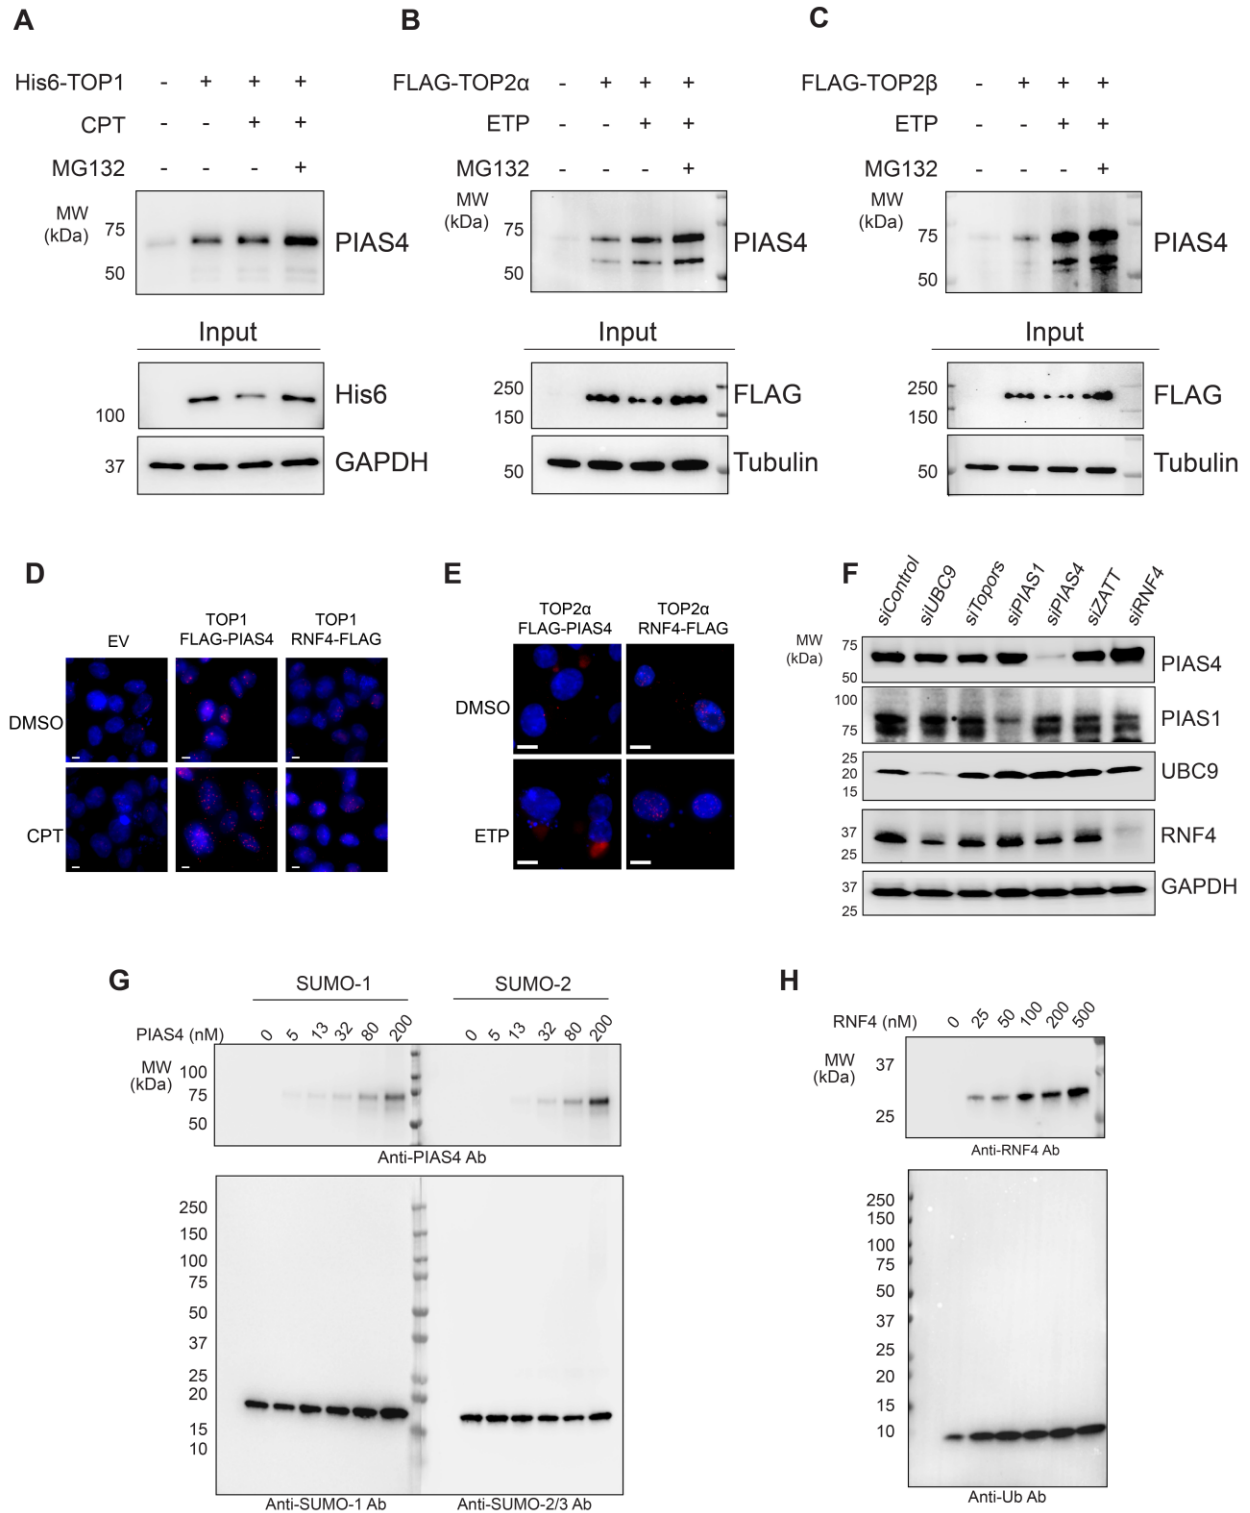

**Fig. S5: Coordination of PIAS4 and RNF4 for TOP-DPC repair**

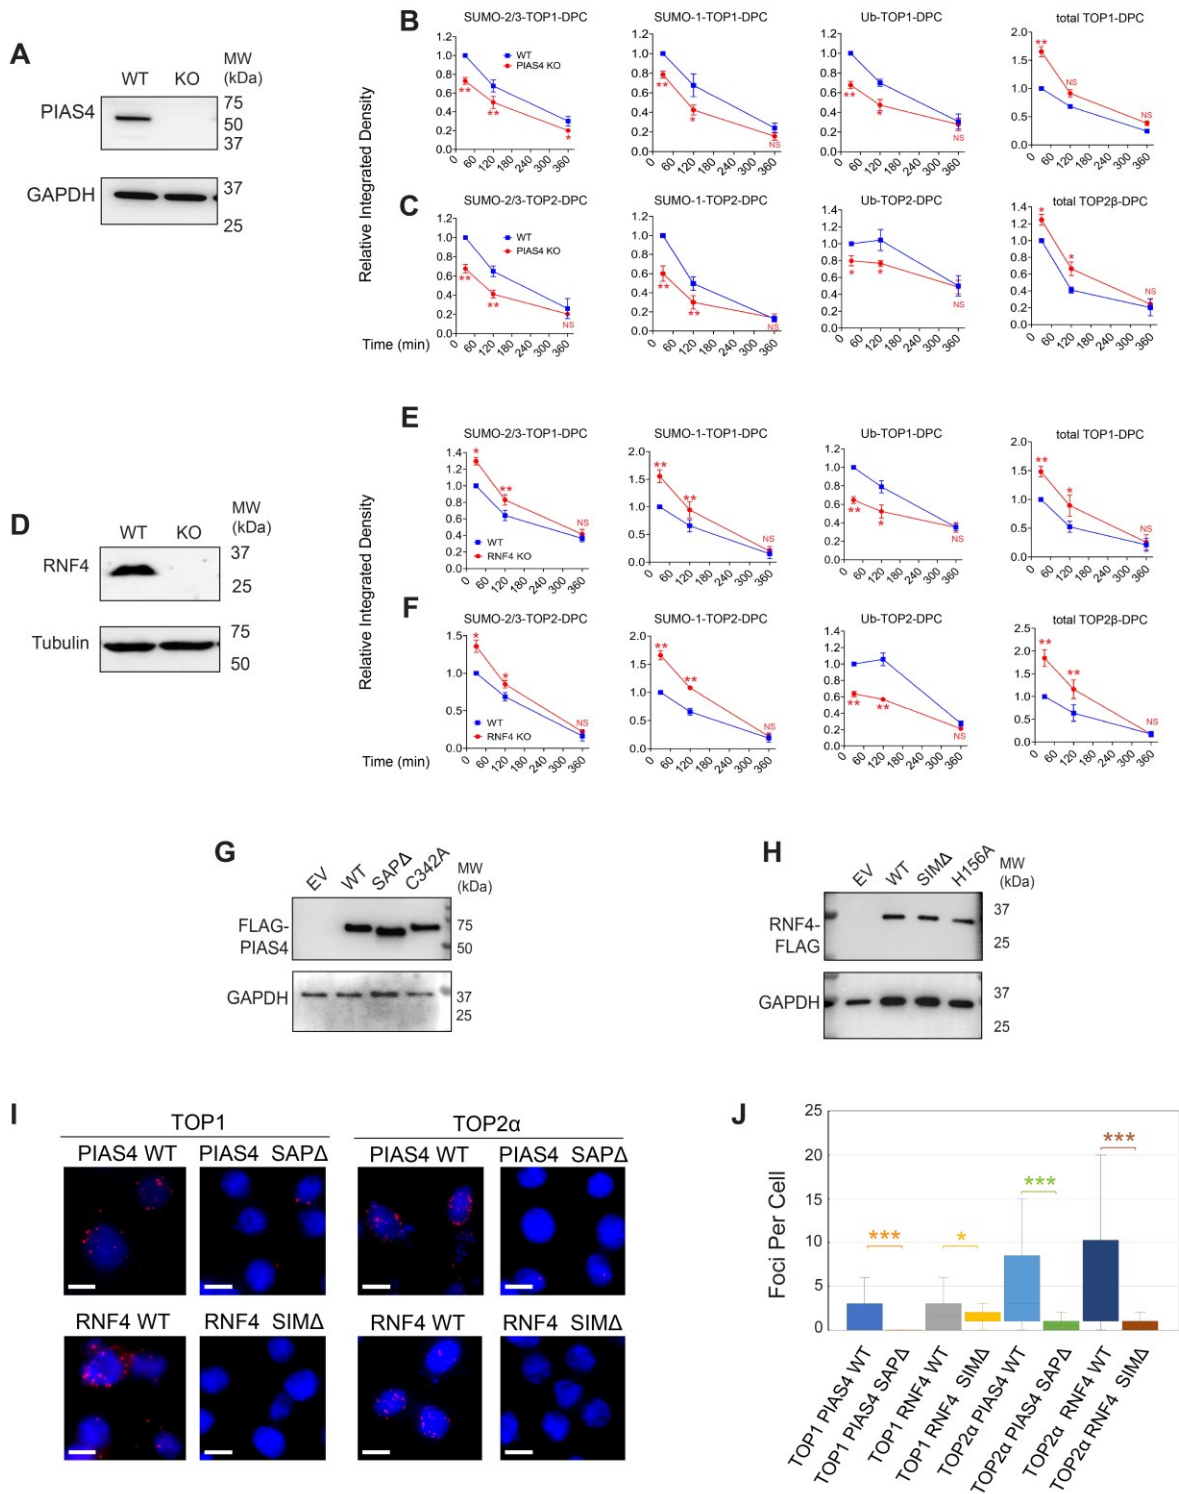

**Fig. S6: SUMOylation and SUMO-dependent ubiquitylation of TOP-DPCs are induced independently of replication, transcription and DDRs in Human Cells**

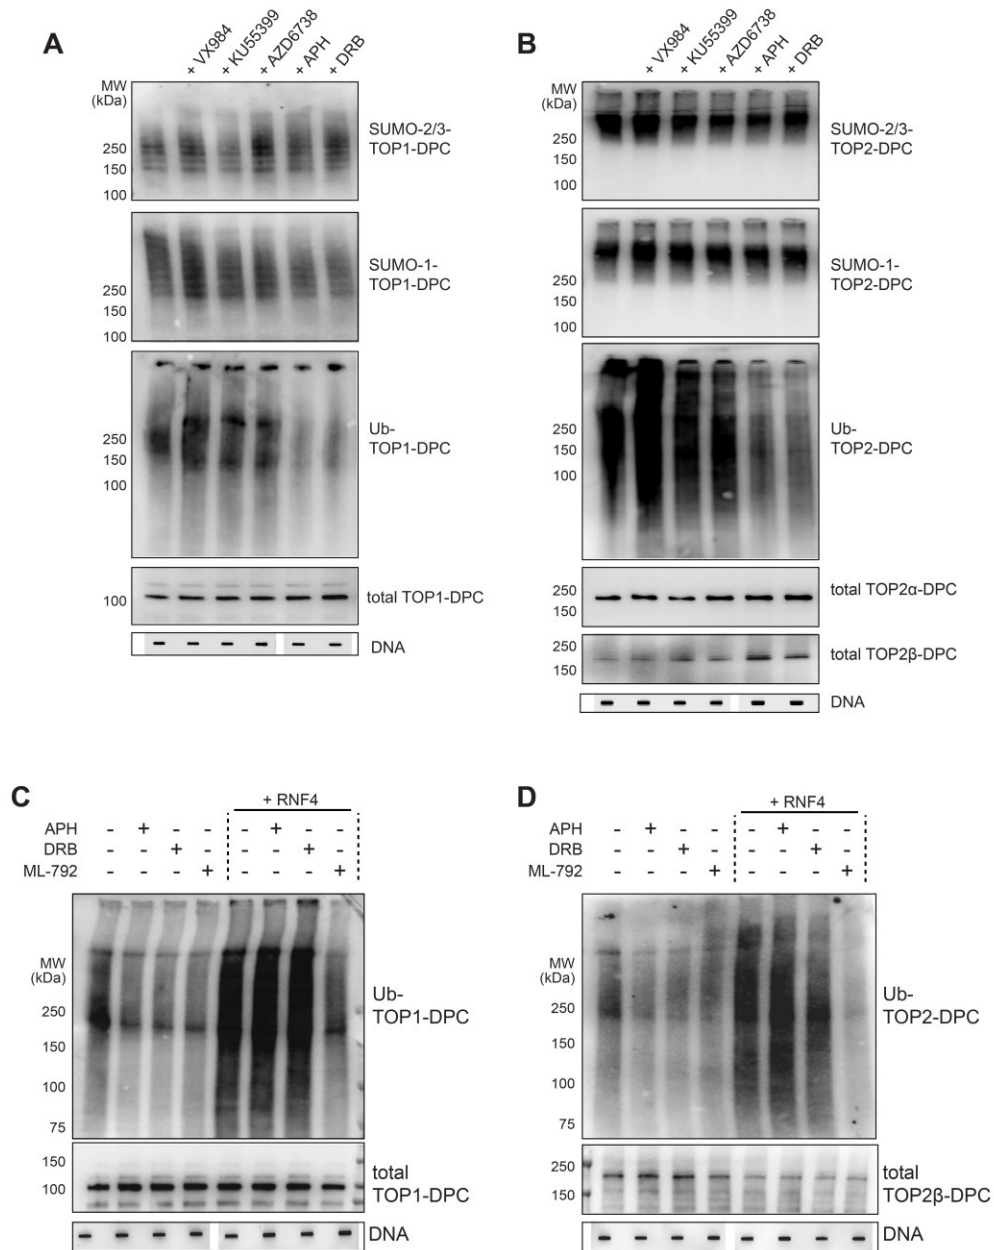

**Fig. S7: RNF4 Drives Proteasomal Degradation of TOP-DPCs and Responses to Topoisomerase-mediated DNA damage**

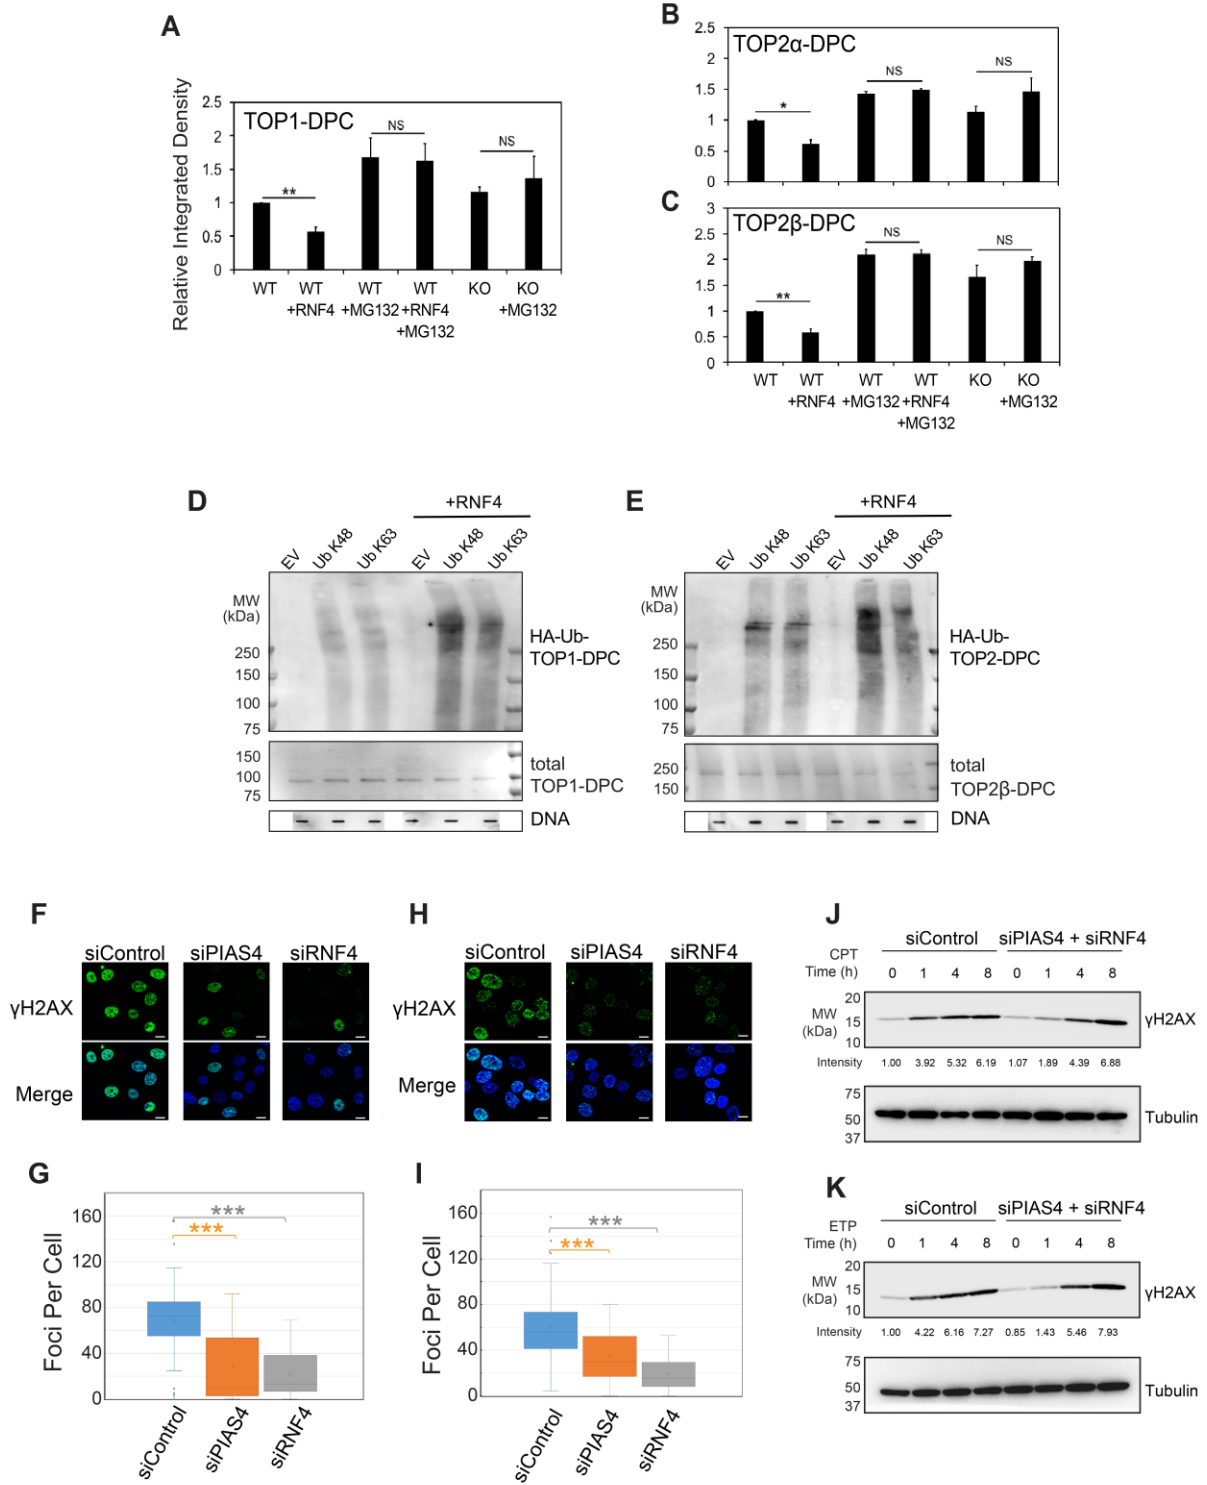

**Fig. S8: The SUMO-Ub-Proteasome Pathway Repairs Topoisomerase-Mediated DNA Damage in Yeast**

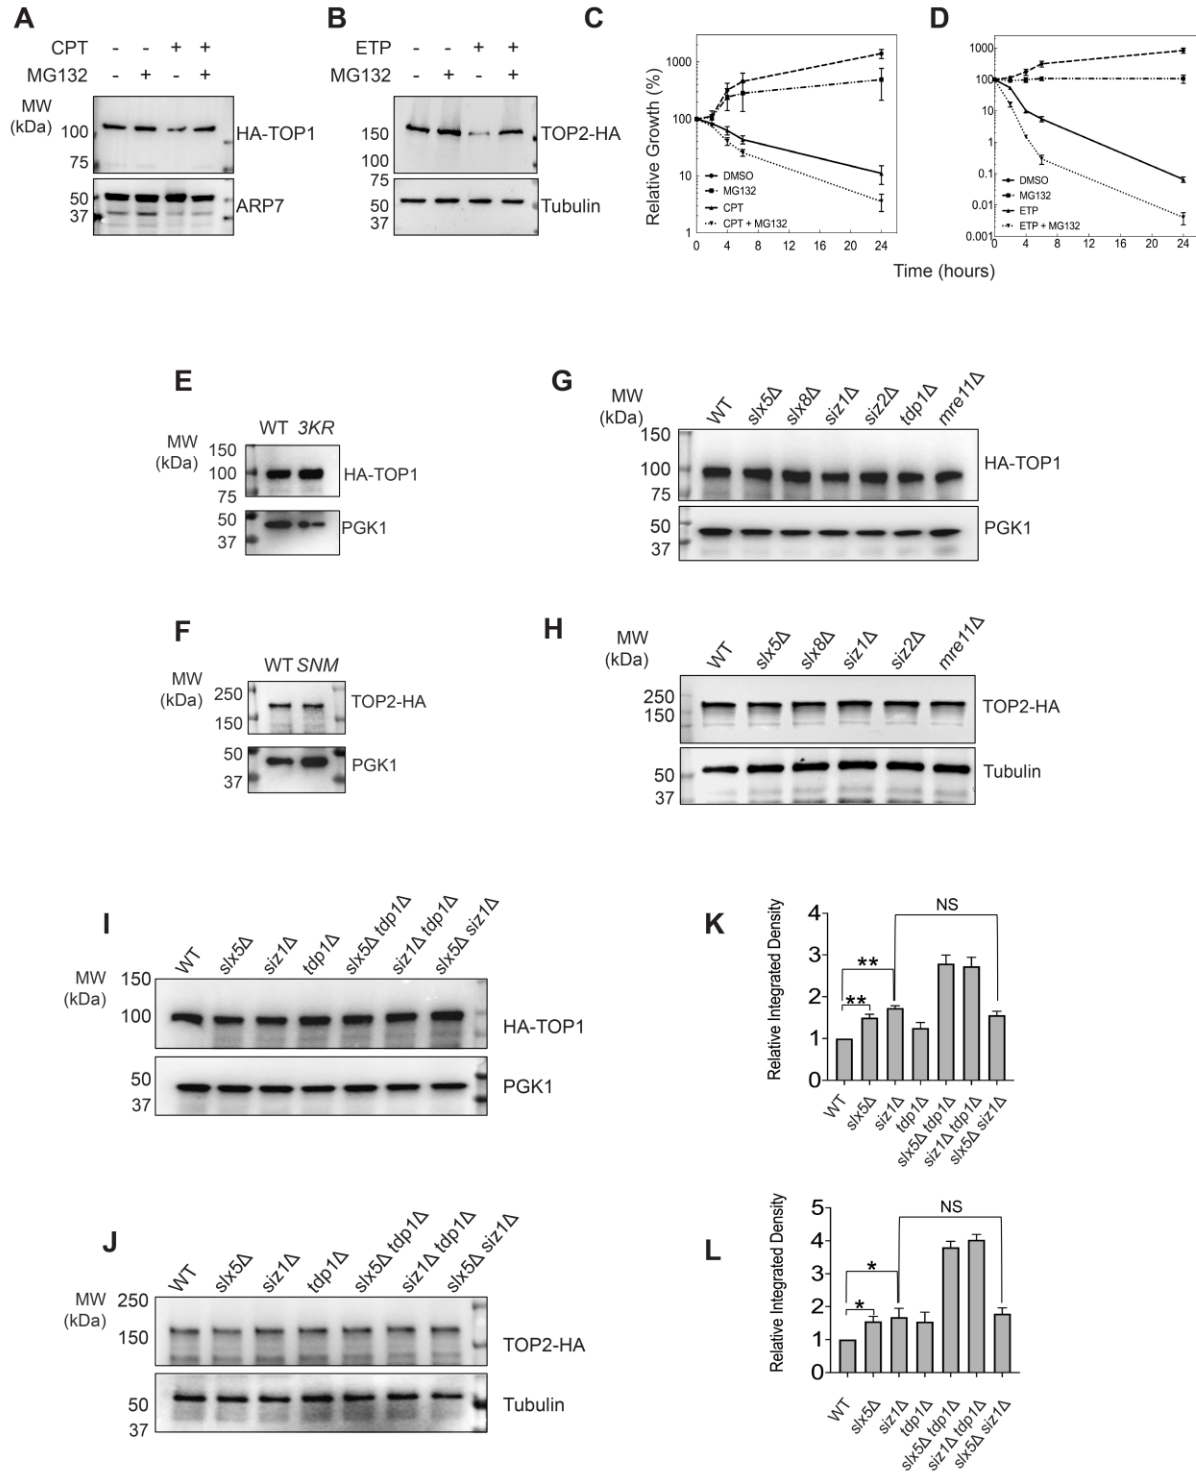

**Table S1**

| <b>Chemicals</b>                                             | <b>Source</b> | <b>Identifier</b> |
|--------------------------------------------------------------|---------------|-------------------|
| Camptothecin (CPT)                                           | Sigma         | Cat# C9911        |
| Etoposide (ETP)                                              | Sigma         | Cat# E1383        |
| Amsacrine                                                    | Sigma         | Cat# A9809        |
| MG132                                                        | Selleckchem   | Cat# S2619        |
| TAK-243                                                      | Chemietek     | Cat# CT-M7243     |
| ML-792                                                       | MedKoo        | Cat# 407886       |
| VX-984                                                       | MedKoo        | Cat# 206853       |
| KU-55399                                                     | Selleckchem   | Cat# S1092        |
| AZD6738                                                      | Selleckchem   | Cat# S7693        |
| Aphidicolin                                                  | Sigma         | Cat# A0781        |
| 5,6-Dichlorobenzimidazole 1- $\beta$ -D-ribofuranoside (DRB) | Sigma         | Cat# D1916        |

**Table S2**

| <b>Human Cell Lines</b> | <b>Source</b> |
|-------------------------|---------------|
| HEK293 cells            | ATCC          |
| HCT116 cells            | ATCC          |
| HCT116 PIAS4 KO cells   | This study    |
| MCF7 cells              | ATCC          |
| MCF7 RNF4 KO cells      | This study    |
| U2OS cells              | ATCC          |
| HeLa cells              | ATCC          |
| HeLa TOP2B KO cells     | This study    |

**Table S3**

| <b>Oligonucleotides</b>         | <b>Sequences</b>                                                                                                                                                                                                                   |
|---------------------------------|------------------------------------------------------------------------------------------------------------------------------------------------------------------------------------------------------------------------------------|
| TOP2B gRNA                      | 5'-CACCGGATTTGGCTGGTTCGTGTAG-3' and 5'-ACCGTAAATTTGGACAGATCTGGT-3'                                                                                                                                                                 |
| PIAS4 gRNA                      | 5'-CACCGCATGCACTCCACCTACGACC-3' and 5'-CACCGAGAACGGCAGCTTCACCAGG-3'                                                                                                                                                                |
| RNF4 gRNA                       | 5'-CACCGAGGCAAAGAAAATCGAGACC-3' and 5'-CACCGCATACACTCTCGTCCACGGC-3'                                                                                                                                                                |
| His6-human TOP1                 | 5'-GCATATCCTCGAGCGCCACCATGGCCCATCATCACCATCACCACAGTGGGGACCACCTCCACAAC -3' and 5'-GCTAGAGCGGCCGCTAAAACCTCATAGTCTTCATCAGC -3'                                                                                                         |
| FLAG-human TOP2 $\alpha$        | 5'-GCATATCCTCGAGCGCCACCATGGACTACAAGGACGACGATGACAAGGAAGTGTCA CCATTGCAGCCTGTAAAT-3' and 5'-GCTAGAGCGGCCGCTAAAACAGATCATCTTCATCTGACTC-3'                                                                                               |
| FLAG-human TOP2 $\beta$         | 5'-GCATATCCTCGAGCGCCACCATGGACTACAAGGACGACGATGACAAGGCCAAGTCG GGTGGCTGCGGCGGGGA-3' and 5'-GCATATCCTCGAGCGCCACCATGGCCCATCATCACCATCACCACGCCAAGTCGGGT GGCTGCGGCGGGGA-3'                                                                 |
| TOP1 Y723F                      | 5'-CTAGGGTCCAGAAAATTGAGTTTGGAGGTTCCCAGG-3'                                                                                                                                                                                         |
| TOP1 K117, K153, K103R (CPT3KR) | 5'-TCTTCAGGTTTCATCTCTAATTTGTGGTGGACTAGAGAAGC-3' (K117R), 5'-TCTTGGTATCTTCTGTTCTAATTTTCTTAGGTTTATAATCAGCATCATCC-3' (K153R), 5'-TTCCTTCTCCTTCTTATTTTTGCATCCCCAGAGGCT-3' (K103R)                                                      |
| Ubiquitin K6R                   | 5'-ATCTTCGTGAGGACCCTGACTGG-3'                                                                                                                                                                                                      |
| Ubiquitin K11R                  | 5'-CTGACTGGTAGGACCATCACTC-3'                                                                                                                                                                                                       |
| Ubiquitin K27R                  | 5'-GAGAATGTCAGGGCAAAGATCC-3'                                                                                                                                                                                                       |
| Ubiquitin K29R                  | 5' GTCAAGGCAAGGATCCAAGAC-3'                                                                                                                                                                                                        |
| Ubiquitin K33R                  | 5'-ATCCAAGACAGGGAAGGCATC-3'                                                                                                                                                                                                        |
| Ubiquitin K48R                  | 5'-TTTGCTGGGAGACAGCTGGAA-3'                                                                                                                                                                                                        |
| Ubiquitin K63R                  | 5'-AACATCCAGAGAGAGTCCACCC-3'                                                                                                                                                                                                       |
| SUMO-1 K7R                      | 5'-CAGGAGGCAAGACCTTCAACTG-3'                                                                                                                                                                                                       |
| SUMO-2 K11R                     | 5'-GAAGGAGTCAGGACTGAGAACAAAC-3'                                                                                                                                                                                                    |
| PIAS4 C342A                     | 5'-GGCAGAGACCGCCGCCACCTGCAG-3'                                                                                                                                                                                                     |
| PIAS4 SAP $\Delta$              | 5'-CAGTTTACTGTAGCCCTG-3'                                                                                                                                                                                                           |
| RNF4 SIM2, 3, 4 $\Delta$        | 5'-GACGCCACTTGTGAATCTTTAGAGC-3' (SIM2 $\Delta$ ), 5'-GATGCGACTCACAATGACTCTG-3' (SIM3 $\Delta$ ), 5'-GCTGCAGACGAAAAGAAGAAGACCAAG-3' (SIM4 $\Delta$ )                                                                                |
| RNF4 H156A                      | 5'-AGAATGCGGCGCTGTCTTCTGTAGC-3'                                                                                                                                                                                                    |
| HA-yeast TOP1                   | 5'-GCATATCCATGGCCTATCCGTATGATGTGCCTGACTACGCAACTATTGCTGATGCTT CCAAAGTT-3' and 5'-GCTAGACTCGAGTTAAAACCTCCAATTTTCATCTAC-3'                                                                                                            |
| Yeast TOP1 K65, 91, 92R         | 5'-AGATTTCCAAGAAAAGACTAAGAAAATAAGGACCGAACCAGTGCAA-3'(K65R), 5'-G GCGCGACATCAAAGCCTAAAAAATCAGGAGAGAAGATGGTGTAG-3'(K91,92R)                                                                                                          |
| Yeast TOP2 SNM                  | 5'-GCTAGAAAAGGGCAAAAAAATTAGGGTCGAGGATAAGAATTTG-3'(K1220R), 5'-GCAAGGCGCCTACAAAGATTAGAAGAGAGAAAACGCCCTTCTGTTTC-3'(K1246R, K1247R) and 5'-CTTCTTCTATTTTCGACATAA <sub>g</sub> GA <sub>g</sub> AGAAGATAAAGATGAGGGCG-3'(K1277R, K1278R) |



**Table S4**

| <b>Expression Plasmids</b>             | <b>Source</b> | <b>Identifier</b> |
|----------------------------------------|---------------|-------------------|
| pT-REx His6-hTOP1                      | This study    | N/A               |
| pT-REx His6-hTOP1 CPT3KR               | This study    | N/A               |
| pT-REx His6-hTOP1 Y723F                | This study    | N/A               |
| pT-REx FLAG-hTOP2 $\alpha$             | This study    | N/A               |
| pT-REx-FLAG-hTOP2 $\beta$              | This study    | N/A               |
| pRK5 HA-Ubiquitin WT                   | Addgene       | Cat# 17608        |
| pRK5 HA-Ubiquitin K6R                  | This study    | N/A               |
| pRK5 HA-Ubiquitin K11R                 | This study    | N/A               |
| pRK5 HA-Ubiquitin K27R                 | This study    | N/A               |
| pRK5 HA-Ubiquitin K29R                 | This study    | N/A               |
| pRK5 HA-Ubiquitin K33R                 | This study    | N/A               |
| pRK5 HA-Ubiquitin K48R                 | This study    | N/A               |
| pRK5 HA-Ubiquitin K63R                 | This study    | N/A               |
| pRK5 HA-Ubiquitin K48                  | This study    | N/A               |
| pRK5 HA-Ubiquitin K63                  | This study    | N/A               |
| pcDNA3 HA-SUMO-1 WT                    | Addgene       | Cat# 48966        |
| pcDNA3 HA-SUMO-1 K7R                   | This study    | N/A               |
| pcDNA3 HA-SUMO-2 WT                    | Addgene       | Cat# 48967        |
| pcDNA3 HA-SUMO-2 K11R                  | This study    | N/A               |
| pCMV FLAG-PIAS4                        | Addgene       | Cat# 15208        |
| pCMV FLAG-PIAS4 K360, 370R             | This study    | N/A               |
| pCMV FLAG-PIAS4 C342A                  | This study    | N/A               |
| pCMV FLAG-PIAS4 SAP $\Delta$           | This study    | N/A               |
| pCMV RNF4-Myc-FLAG WT                  | OriGene       | Cat# RC207273     |
| pCMV RNF4-Myc-FLAG SIM2, 3, 4 $\Delta$ | This study    | N/A               |
| pCMV RNF4-Myc-FLAG H156A               | This study    | N/A               |
| pDEST FLAG-HA-PSMD14                   | Addgene       | Cat# 22557        |
| pCMV PSMB5-Myc-FLAG                    | OriGene       | Cat# RC209326     |
| pSpCas9(BB)-2A-GFP (PX458)             | Addgene       | Cat# 48138        |
| pSpCas9(BB)-2A-Puro (PX459) V2.0       | Addgene       | Cat# 62988        |
| pYX112 HA-yTOP1                        | This study    | N/A               |
| pYX112 HA-yTOP1 K65, 91, 92R           | This study    | N/A               |
| pDED1 yTOP2-3 $\times$ HA              | This study    | N/A               |
| pDED1 yTOP2-3 $\times$ HA <i>SNM</i>   | This study    | N/A               |
| pBluescript PDR1-DBD-Cyc8 (pAGS1)      | (60)          | N/A               |

**Table S5**

| <b>Small interfering RNA</b> | <b>Source</b> | <b>Identifier</b>     |
|------------------------------|---------------|-----------------------|
| Control siRNA                | Dharmacon     | Cat# D-001206-13-05   |
| TOP2A siRNA                  | Dharmacon     | Cat# M-004239-00-0005 |
| SUMO-1 siRNA                 | Dharmacon     | Cat# M-016005-00-0005 |
| SUMO-2 siRNA                 | Dharmacon     | Cat# L-016450-00      |
| SUMO-3 siRNA                 | Dharmacon     | Cat# L-019730-00      |
| UBC9 siRNA                   | Dharmacon     | Cat# M-004910-00-0005 |
| TOPORS siRNA                 | Dharmacon     | Cat# M-020048-00-0005 |
| PIAS1 siRNA                  | Dharmacon     | Cat# M-008167-00-0005 |
| PIAS4 siRNA                  | Dharmacon     | Cat# M-006445-00-0005 |
| RNF4 siRNA                   | Dharmacon     | Cat# M-006557-00-0005 |
| RNF111 siRNA                 | Dharmacon     | Cat# M-007002-00-0005 |

**Table S6**

| <b>Antibodies</b>                                     | <b>Source</b>     | <b>Identifier</b>                    |
|-------------------------------------------------------|-------------------|--------------------------------------|
| Anti-ubiquitin, mouse monoclonal                      | Santa Cruz        | Cat# sc-8017; RRID: AB_2762364       |
| Anti-SUMO-1, rabbit monoclonal                        | Cell Signaling    | Cat# 4940; RRID: AB_2302825          |
| Anti-SUMO-2/3, rabbit monoclonal                      | Cell Signaling    | Cat# 4971; RRID: AB_2198425          |
| Anti-phospho-Histone H2A.X (Ser139), mouse monoclonal | Millipore         | Cat# 05-636-l; RRID: AB_2755003      |
| Anti-TOP1, mouse monoclonal                           | BD Biosciences    | Cat# 556597; RRID: AB_396474         |
| Anti-TOP1cc, mouse monoclonal                         | Millipore         | Cat# MABE1084; RRID: AB_2756354      |
| Anti-TOP2 $\alpha$ , mouse monoclonal                 | Millipore         | Cat# MAB4197; RRID: AB_2205862       |
| Anti-TOP2 $\beta$ , mouse monoclonal                  | BD Biosciences    | Cat# 611492; RRID: AB_398952         |
| Anti-His tag, rabbit monoclonal                       | Cell Signaling    | Cat# 12698; RRID: AB_2744546         |
| Anti-FLAG, mouse monoclonal                           | Sigma             | Cat# F1804; RRID: AB_262044          |
| Anti-FLAG, rabbit polyclonal                          | Sigma             | Cat# F7425; RRID: AB_439687          |
| Anti-dsDNA, mouse monoclonal                          | Abcam             | Cat# ab27156; RRID: AB_470907        |
| Anti-UBC9, rabbit monoclonal                          | Cell Signaling    | Cat# 4786; RRID: AB_10559206         |
| Anti-PIAS1, rabbit polyclonal                         | Abcam             | Cat# ab32219; RRID: AB_777265        |
| Anti-PIAS4, rabbit polyclonal                         | Abcam             | Cat# ab58416; RRID: AB_881880        |
| Anti-Topors, mouse monoclonal                         | Santa Cruz        | Cat# sc-101182; RRID: AB_2240782     |
| Anti-RNF4, goat polyclonal                            | R&D Systems       | Cat# AF7964                          |
| Anti-RNF111, mouse monoclonal                         | Novus Biologicals | Cat# H00054778-M05; RRID:AB_2285381) |
| Anti-HA, rabbit polyclonal                            | Santa Cruz        | Cat# sc-805; RRID: AB_631618         |
| Anti- $\alpha$ Tubulin, rat polyclonal                | Santa Cruz        | Cat# sc-53030; RRID: AB_2272440      |
| Anti-ARP7, goat polyclonal                            | Santa Cruz        | Cat# sc-8961; RRID: AB_671730        |
| Anti-Smt3, rabbit polyclonal                          | Abcam             | Cat# ab14405; RRID: AB_301186        |
| Anti-ubiquitin, rabbit polyclonal                     | Abcam             | Cat# ab19247; RRID: AB_444805        |

**Table S7**

| <b>Recombinant Proteins</b>                          | <b>Source</b>  | <b>Identifier</b> |
|------------------------------------------------------|----------------|-------------------|
| Human Recombinant TOP1                               | This study     | N/A               |
| Human Recombinant TOP2 $\alpha$                      | This study     | N/A               |
| Human Recombinant TOP2 $\beta$                       | This study     | N/A               |
| Human Recombinant Ubiquitin                          | Boston Biochem | Cat# U-100H       |
| Human Recombinant Ubiquitin Activating Enzyme (UBE1) | Boston Biochem | Cat# E-305        |
| Human Recombinant UbcH5a/UBE2D1                      | Boston Biochem | Cat# E2-616       |
| Human Recombinant PIAS4                              | This study     | N/A               |
| Human Recombinant RNF4                               | R&D Systems    | Cat# E3-210-050   |
| Human Recombinant SUMO-1                             | Boston Biochem | Cat# UL-712       |
| Human Recombinant SUMO-2                             | Boston Biochem | Cat# UL-752       |
| Human Recombinant SUMO E1 (SAE1/UBA2)                | Boston Biochem | Cat# E-311        |
| Human Recombinant UBC9/UBE2I                         | Boston Biochem | Cat# E2-645       |

**Table S8**

| <b>Yeast Strains</b>                             | <b>Source</b> |
|--------------------------------------------------|---------------|
| YMM10                                            | (49)          |
| BY4741 <i>slx5</i> $\Delta$                      | Dharmacon     |
| BY4741 <i>slx8</i> $\Delta$                      | Dharmacon     |
| BY4741 <i>siz1</i> $\Delta$                      | Dharmacon     |
| BY4741 <i>siz2</i> $\Delta$                      | Dharmacon     |
| BY4741 <i>tdp1</i> $\Delta$                      | Dharmacon     |
| BY4741 <i>mre11</i> $\Delta$                     | Dharmacon     |
| BY4741 <i>slx5</i> $\Delta$ <i>tdp1</i> $\Delta$ | This study    |
| BY4741 <i>siz1</i> $\Delta$ <i>tdp1</i> $\Delta$ | This study    |
| BY4741 <i>siz1</i> $\Delta$ <i>slx5</i> $\Delta$ | This study    |
